# Supplementary material
Source: PubMed Central journal article supplement (PMC10194033)
Supplement: NIHMS1891357-supplement-6.pdf [file NIHMS1891357-supplement-6.pdf]

465 **SUPPLEMENTARY MATERIAL:**466 **Supplementary Table 1:** Summary statistics of chemical components included in the analysis.

467

| <b>Components</b>                     | <b>Mean (SD)</b> |
|---------------------------------------|------------------|
| Bromine (ng/m <sup>3</sup> )          | 2.63 (0.60)      |
| Calcium (ng/m <sup>3</sup> )          | 46.76 (21.22)    |
| Copper (ng/m <sup>3</sup> )           | 2.36 (1.77)      |
| Elemental Carbon (µg/m <sup>3</sup> ) | 0.50 (0.24)      |
| Iron (ng/m <sup>3</sup> )             | 60.55 (25.14)    |
| Potassium (ng/m <sup>3</sup> )        | 55.78 (11.08)    |
| Nickel (ng/m <sup>3</sup> )           | 0.89 (0.34)      |
| Nitrate (µg/m <sup>3</sup> )          | 0.48 (0.47)      |
| Organic Carbon (µg/m <sup>3</sup> )   | 1.09 (0.59)      |
| Lead (ng/m <sup>3</sup> )             | 1.64 (0.53)      |
| Silicon (ng/m <sup>3</sup> )          | 1.89 (0.82)      |
| Sulfate (µg/m <sup>3</sup> )          | 115.59 (48.86)   |
| Vanadium (ng/m <sup>3</sup> )         | 2.09 (0.75)      |
| Zinc (ng/m <sup>3</sup> )             | 0.58 (0.49)      |

468

469 **Supplementary Table 2:** The associations between 10% increases in ZIP code characteristics  
 470 and source categories. We fit generalized nonlinear models including each ZIP code  
 471 characteristic separately to assess the independent associations with each source category. We  
 472 adjusted for population density, RUCA, % population over 65, and % population female.  
 473

| Predictor            | Source category                              | Estimate (95%CI)           |
|----------------------|----------------------------------------------|----------------------------|
| % Below Poverty Line | PM <sub>2.5</sub>                            | 0.106 ( 0.086 ; 0.127 )    |
|                      | Soil and Crustal Dust                        | 0.456 ( 0.428 ; 0.484 )    |
|                      | Heavy Fuel Oil and Industrial                | 0.313 ( 0.258 ; 0.369 )    |
|                      | Metal Processing Industry and Agricultural   | 0.197 ( 0.162 ; 0.233 )    |
|                      | Coal and Oil Combustion, and Biomass Burning | -0.171 ( -0.189 ; -0.152 ) |
|                      | Motor Vehicle                                | 0.787 ( 0.739 ; 0.835 )    |
| % No High School     | PM <sub>2.5</sub>                            | 0.207 ( 0.186 ; 0.227 )    |
|                      | Soil and Crustal Dust                        | 0.541 ( 0.513 ; 0.569 )    |
|                      | Heavy Fuel Oil and Industrial                | 0.251 ( 0.196 ; 0.307 )    |
|                      | Metal Processing Industry and Agricultural   | 0.219 ( 0.183 ; 0.255 )    |
|                      | Coal and Oil Combustion, and Biomass Burning | -0.049 ( -0.068 ; -0.03 )  |
|                      | Motor Vehicle                                | 0.6 ( 0.552 ; 0.649 )      |
| % Renters            | PM <sub>2.5</sub>                            | 0.124 ( 0.113 ; 0.136 )    |
|                      | Soil and Crustal Dust                        | 0.075 ( 0.059 ; 0.091 )    |
|                      | Heavy Fuel Oil and Industrial                | 0.547 ( 0.517 ; 0.578 )    |
|                      | Metal Processing Industry and Agricultural   | 0.23 ( 0.21 ; 0.25 )       |
|                      | Coal and Oil Combustion, and Biomass Burning | -0.203 ( -0.213 ; -0.193 ) |
|                      | Motor Vehicle                                | 0.712 ( 0.686 ; 0.738 )    |
| % Non-Hispanic Black | PM <sub>2.5</sub>                            | 0.079 ( 0.068 ; 0.091 )    |
|                      | Soil and Crustal Dust                        | -0.01 ( -0.027 ; 0.006 )   |
|                      | Heavy Fuel Oil and Industrial                | 0.328 ( 0.296 ; 0.359 )    |
|                      | Metal Processing Industry and Agricultural   | 0.164 ( 0.144 ; 0.184 )    |
|                      | Coal and Oil Combustion, and Biomass Burning | -0.089 ( -0.1 ; -0.078 )   |
|                      | Motor Vehicle                                | 0.383 ( 0.356 ; 0.411 )    |

474  
 475 **Supplementary Table 3:** The associations between ZIP code characteristics and source  
 476 categories, stratified by US regions. We fit generalized nonlinear models including each ZIP  
 477 code characteristic, separately, to assess the independent associations with each source category.  
 478 Estimates are associated with a 10% change in the predictors. We adjusted for population  
 479 density, RUCA, % population over 65, and % population female.  
 480

| Region | Predictor            | Source category                              | Estimate (95%CI)          |
|--------|----------------------|----------------------------------------------|---------------------------|
| West   | % Below Poverty Line | PM <sub>2.5</sub>                            | 0.509 ( 0.439 ; 0.579 )   |
|        |                      | Soil and Crustal Dust                        | 0.64 ( 0.541 ; 0.739 )    |
|        |                      | Heavy Fuel Oil and Industrial                | 0.179 ( 0.033 ; 0.325 )   |
|        |                      | Metal Processing Industry and Agricultural   | 0.17 ( 0.081 ; 0.259 )    |
|        |                      | Coal and Oil Combustion, and Biomass Burning | -0.049 ( -0.088 ; -0.01 ) |
|        |                      | Motor Vehicle                                | 1.166 ( 1.017 ; 1.315 )   |
|        | % No High School     | PM <sub>2.5</sub>                            | 0.618 ( 0.561 ; 0.674 )   |
|        |                      | Soil and Crustal Dust                        | 0.764 ( 0.683 ; 0.844 )   |
|        |                      | Heavy Fuel Oil and Industrial                | -0.119 ( -0.241 ; 0.002 ) |
|        |                      | Metal Processing Industry and Agricultural   | 0.456 ( 0.383 ; 0.529 )   |
|        |                      | Coal and Oil Combustion, and Biomass Burning | 0.053 ( 0.021 ; 0.086 )   |
|        |                      | Motor Vehicle                                | 1.076 ( 0.953 ; 1.199 )   |
|        | % Renters            | PM <sub>2.5</sub>                            | 0.328 ( 0.291 ; 0.365 )   |

| Region    | Predictor            | Source category                              | Estimate (95%CI)           |
|-----------|----------------------|----------------------------------------------|----------------------------|
|           |                      | Soil and Crustal Dust                        | -0.069 ( -0.123 ; -0.015 ) |
|           |                      | Heavy Fuel Oil and Industrial                | 0.695 ( 0.619 ; 0.771 )    |
|           |                      | Metal Processing Industry and Agricultural   | 0.184 ( 0.136 ; 0.231 )    |
|           |                      | Coal and Oil Combustion, and Biomass Burning | -0.121 ( -0.142 ; -0.101 ) |
|           |                      | Motor Vehicle                                | 0.875 ( 0.797 ; 0.953 )    |
|           | % non-Hispanic Black | PM <sub>2.5</sub>                            | 0.507 ( 0.4 ; 0.614 )      |
|           |                      | Soil and Crustal Dust                        | 0.177 ( 0.025 ; 0.329 )    |
|           |                      | Heavy Fuel Oil and Industrial                | 1.896 ( 1.682 ; 2.111 )    |
|           |                      | Metal Processing Industry and Agricultural   | 0.485 ( 0.351 ; 0.62 )     |
|           |                      | Coal and Oil Combustion, and Biomass Burning | -0.415 ( -0.473 ; -0.356 ) |
|           |                      | Motor Vehicle                                | 1.141 ( 0.912 ; 1.371 )    |
| South     | % Below Poverty Line | PM <sub>2.5</sub>                            | -0.013 ( -0.036 ; 0.011 )  |
|           |                      | Soil and Crustal Dust                        | 0.586 ( 0.541 ; 0.63 )     |
|           |                      | Heavy Fuel Oil and Industrial                | 0.227 ( 0.154 ; 0.3 )      |
|           |                      | Metal Processing Industry and Agricultural   | -0.032 ( -0.076 ; 0.012 )  |
|           |                      | Coal and Oil Combustion, and Biomass Burning | -0.172 ( -0.202 ; -0.141 ) |
|           |                      | Motor Vehicle                                | 0.744 ( 0.672 ; 0.817 )    |
|           | % No High School     | PM <sub>2.5</sub>                            | -0.078 ( -0.101 ; -0.054 ) |
|           |                      | Soil and Crustal Dust                        | 0.617 ( 0.573 ; 0.661 )    |
|           |                      | Heavy Fuel Oil and Industrial                | 0.24 ( 0.167 ; 0.312 )     |
|           |                      | Metal Processing Industry and Agricultural   | -0.126 ( -0.169 ; -0.082 ) |
|           |                      | Coal and Oil Combustion, and Biomass Burning | -0.108 ( -0.138 ; -0.078 ) |
|           |                      | Motor Vehicle                                | 0.358 ( 0.285 ; 0.431 )    |
|           | % Renters            | PM <sub>2.5</sub>                            | 0.061 ( 0.047 ; 0.075 )    |
|           |                      | Soil and Crustal Dust                        | 0.174 ( 0.147 ; 0.201 )    |
|           |                      | Heavy Fuel Oil and Industrial                | 0.229 ( 0.185 ; 0.272 )    |
|           |                      | Metal Processing Industry and Agricultural   | 0.145 ( 0.119 ; 0.171 )    |
|           |                      | Coal and Oil Combustion, and Biomass Burning | -0.187 ( -0.205 ; -0.169 ) |
|           |                      | Motor Vehicle                                | 0.771 ( 0.73 ; 0.813 )     |
|           | % non-Hispanic Black | PM <sub>2.5</sub>                            | 0.084 ( 0.073 ; 0.095 )    |
|           |                      | Soil and Crustal Dust                        | -0.046 ( -0.068 ; -0.024 ) |
|           |                      | Heavy Fuel Oil and Industrial                | 0.227 ( 0.192 ; 0.261 )    |
|           |                      | Metal Processing Industry and Agricultural   | 0.041 ( 0.02 ; 0.062 )     |
|           |                      | Coal and Oil Combustion, and Biomass Burning | -0.004 ( -0.019 ; 0.01 )   |
|           |                      | Motor Vehicle                                | 0.308 ( 0.273 ; 0.342 )    |
| Northeast | % Below Poverty Line | PM <sub>2.5</sub>                            | 0.112 ( 0.053 ; 0.17 )     |
|           |                      | Soil and Crustal Dust                        | 0.016 ( -0.013 ; 0.045 )   |
|           |                      | Heavy Fuel Oil and Industrial                | 0.866 ( 0.611 ; 1.12 )     |
|           |                      | Metal Processing Industry and Agricultural   | 0.649 ( 0.519 ; 0.779 )    |
|           |                      | Coal and Oil Combustion, and Biomass Burning | -0.201 ( -0.257 ; -0.145 ) |
|           |                      | Motor Vehicle                                | 0.167 ( 0.061 ; 0.273 )    |
|           | % No High School     | PM <sub>2.5</sub>                            | 0.243 ( 0.175 ; 0.311 )    |
|           |                      | Soil and Crustal Dust                        | -0.078 ( -0.112 ; -0.045 ) |
|           |                      | Heavy Fuel Oil and Industrial                | 1.479 ( 1.184 ; 1.773 )    |
|           |                      | Metal Processing Industry and Agricultural   | 0.121 ( -0.033 ; 0.275 )   |
|           |                      | Coal and Oil Combustion, and Biomass Burning | -0.014 ( -0.08 ; 0.051 )   |
|           |                      | Motor Vehicle                                | -0.446 ( -0.568 ; -0.324 ) |
|           | % Renters            | PM <sub>2.5</sub>                            | 0.11 ( 0.082 ; 0.137 )     |
|           |                      | Soil and Crustal Dust                        | -0.067 ( -0.081 ; -0.053 ) |
|           |                      | Heavy Fuel Oil and Industrial                | 1.377 ( 1.265 ; 1.49 )     |
|           |                      | Metal Processing Industry and Agricultural   | 0.361 ( 0.3 ; 0.423 )      |
|           |                      | Coal and Oil Combustion, and Biomass Burning | -0.323 ( -0.348 ; -0.299 ) |
|           |                      | Motor Vehicle                                | 0.499 ( 0.452 ; 0.547 )    |

| Region               | Predictor                                    | Source category                              | Estimate (95%CI)           |
|----------------------|----------------------------------------------|----------------------------------------------|----------------------------|
|                      | % non-Hispanic Black                         | PM <sub>2.5</sub>                            | 0.073 ( 0.034 ; 0.112 )    |
|                      |                                              | Soil and Crustal Dust                        | 0.004 ( -0.015 ; 0.023 )   |
|                      |                                              | Heavy Fuel Oil and Industrial                | 0.821 ( 0.653 ; 0.989 )    |
|                      |                                              | Metal Processing Industry and Agricultural   | 0.192 ( 0.104 ; 0.28 )     |
|                      |                                              | Coal and Oil Combustion, and Biomass Burning | -0.149 ( -0.186 ; -0.112 ) |
|                      |                                              | Motor Vehicle                                | 0.335 ( 0.266 ; 0.404 )    |
| Midwest              | % Below Poverty Line                         | PM <sub>2.5</sub>                            | 0.045 ( 0.013 ; 0.076 )    |
|                      |                                              | Soil and Crustal Dust                        | 0.319 ( 0.287 ; 0.352 )    |
|                      |                                              | Heavy Fuel Oil and Industrial                | 0.014 ( -0.019 ; 0.047 )   |
|                      |                                              | Metal Processing Industry and Agricultural   | 0.366 ( 0.292 ; 0.439 )    |
|                      |                                              | Coal and Oil Combustion, and Biomass Burning | -0.186 ( -0.222 ; -0.151 ) |
|                      |                                              | Motor Vehicle                                | 1.056 ( 0.985 ; 1.128 )    |
|                      | % No High School                             | PM <sub>2.5</sub>                            | 0.099 ( 0.06 ; 0.138 )     |
|                      |                                              | Soil and Crustal Dust                        | 0.317 ( 0.276 ; 0.357 )    |
|                      |                                              | Heavy Fuel Oil and Industrial                | -0.077 ( -0.118 ; -0.036 ) |
|                      |                                              | Metal Processing Industry and Agricultural   | 0.543 ( 0.452 ; 0.633 )    |
|                      |                                              | Coal and Oil Combustion, and Biomass Burning | -0.089 ( -0.133 ; -0.045 ) |
|                      |                                              | Motor Vehicle                                | 1.057 ( 0.967 ; 1.147 )    |
|                      | % Renters                                    | PM <sub>2.5</sub>                            | 0.097 ( 0.079 ; 0.115 )    |
|                      |                                              | Soil and Crustal Dust                        | 0.151 ( 0.133 ; 0.17 )     |
|                      |                                              | Heavy Fuel Oil and Industrial                | 0.06 ( 0.041 ; 0.079 )     |
|                      |                                              | Metal Processing Industry and Agricultural   | 0.408 ( 0.367 ; 0.449 )    |
|                      |                                              | Coal and Oil Combustion, and Biomass Burning | -0.177 ( -0.197 ; -0.157 ) |
|                      |                                              | Motor Vehicle                                | 0.733 ( 0.693 ; 0.773 )    |
| % non-Hispanic Black | PM <sub>2.5</sub>                            | 0.11 ( 0.091 ; 0.129 )                       |                            |
|                      | Soil and Crustal Dust                        | 0.115 ( 0.095 ; 0.135 )                      |                            |
|                      | Heavy Fuel Oil and Industrial                | 0.119 ( 0.099 ; 0.139 )                      |                            |
|                      | Metal Processing Industry and Agricultural   | 0.549 ( 0.506 ; 0.592 )                      |                            |
|                      | Coal and Oil Combustion, and Biomass Burning | -0.239 ( -0.26 ; -0.219 )                    |                            |
|                      | Motor Vehicle                                | 0.733 ( 0.691 ; 0.776 )                      |                            |

481

482

483 **Supplementary Table 4:** estimates for multiple-exposures models. We fit generalized nonlinear  
 484 models including ZIP zip code characteristic to assess the associations with each source  
 485 category. Estimates are associated with a 10% change in the predictors. We adjusted for  
 486 population density, RUCA, % population over 65, and % population female.  
 487

| Source category - Model                      | Predictor            | Estimate (95%CI)           |
|----------------------------------------------|----------------------|----------------------------|
| PM <sub>2.5</sub>                            | % Below Poverty Line | -0.252 ( -0.284 ; -0.221 ) |
|                                              | % No High School     | 0.277 ( 0.251 ; 0.303 )    |
|                                              | % Renters            | 0.149 ( 0.135 ; 0.163 )    |
|                                              | % non-Hispanic Black | 0.048 ( 0.035 ; 0.061 )    |
| Soil and Crustal Dust                        | % Below Poverty Line | 0.366 ( 0.323 ; 0.41 )     |
|                                              | % No High School     | 0.403 ( 0.367 ; 0.439 )    |
|                                              | % Renters            | -0.041 ( -0.06 ; -0.022 )  |
|                                              | % non-Hispanic Black | -0.154 ( -0.172 ; -0.136 ) |
| Heavy Fuel Oil and Industrial                | % Below Poverty Line | -0.692 ( -0.777 ; -0.606 ) |
|                                              | % No High School     | 0.293 ( 0.222 ; 0.364 )    |
|                                              | % Renters            | 0.644 ( 0.607 ; 0.681 )    |
|                                              | % non-Hispanic Black | 0.233 ( 0.198 ; 0.268 )    |
| Metal Processing Industry and Agricultural   | % Below Poverty Line | -0.284 ( -0.339 ; -0.229 ) |
|                                              | % No High School     | 0.234 ( 0.188 ; 0.28 )     |
|                                              | % Renters            | 0.248 ( 0.224 ; 0.272 )    |
|                                              | % non-Hispanic Black | 0.113 ( 0.09 ; 0.136 )     |
| Coal and Oil Combustion, and Biomass Burning | % Below Poverty Line | 0.043 ( 0.014 ; 0.072 )    |
|                                              | % No High School     | 0.031 ( 0.007 ; 0.055 )    |
|                                              | % Renters            | -0.21 ( -0.223 ; -0.197 )  |
|                                              | % non-Hispanic Black | -0.031 ( -0.043 ; -0.019 ) |
| Motor Vehicle                                | % Below Poverty Line | -0.252 ( -0.325 ; -0.18 )  |
|                                              | % No High School     | 0.388 ( 0.328 ; 0.449 )    |
|                                              | % Renters            | 0.689 ( 0.657 ; 0.721 )    |
|                                              | % non-Hispanic Black | 0.144 ( 0.115 ; 0.174 )    |

488

489 **Supplementary Figure 1:** Correlation plot of zip code characteristics.

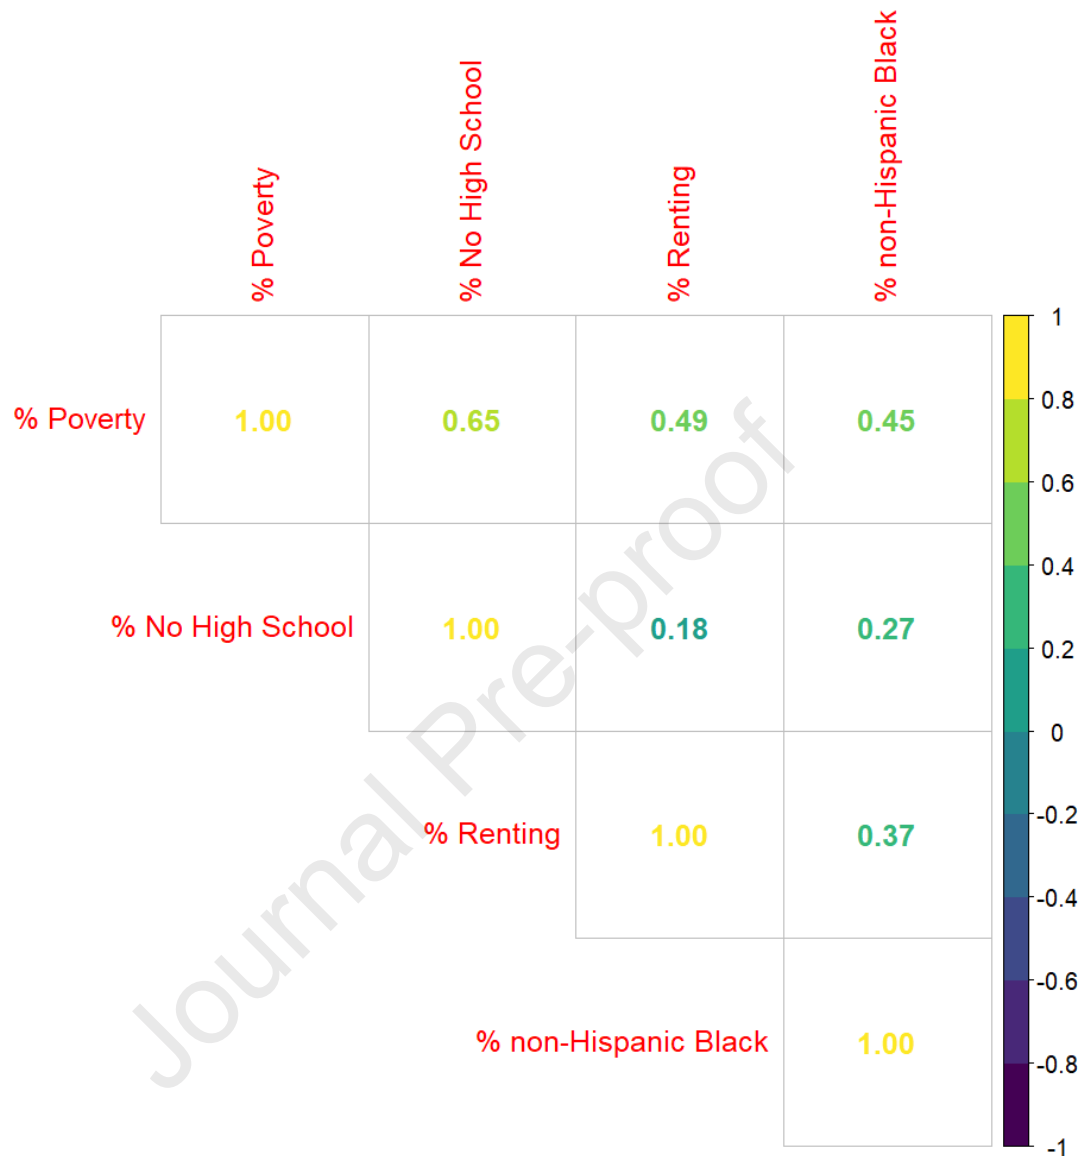

490  
 491  
 492  
 493  
 494  
 495  
 496  
 497  
 498  
 499  
 500  
 501  
 502

**Supplementary Figure 2:** Map of the spatial distribution of the Soil and Crustal Dust source category.

**Supplementary Figure 3:** Map of the spatial distribution of the Metal Processing Industry and Agricultural source category.

**Supplementary Figure 4:** Map of the spatial distribution of the Heavy Fuel Oil and Industrial source category.

**Supplementary Figure 5:** Map of the spatial distribution of the Coal and Oil Combustion, and Biomass Burning.

**Supplementary Figure 6:** Map of the spatial distribution of the Motor Vehicle source category.
